# Supplementary material
Source: Springer Nature journal article supplement (https://www.springermedizin.de/resource/supplementary/12958_2008_439_MOESM8_ESM.pdf/9567888)

PT: COW 68L  
ID:  
RBRU-U OF S  
C9-5 ICT  
SPTAd 1.4MI0.7  
50DB C6 E4  
HDI

17 MAY 93  
10:15 AM

ATL

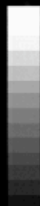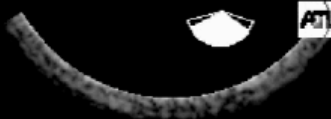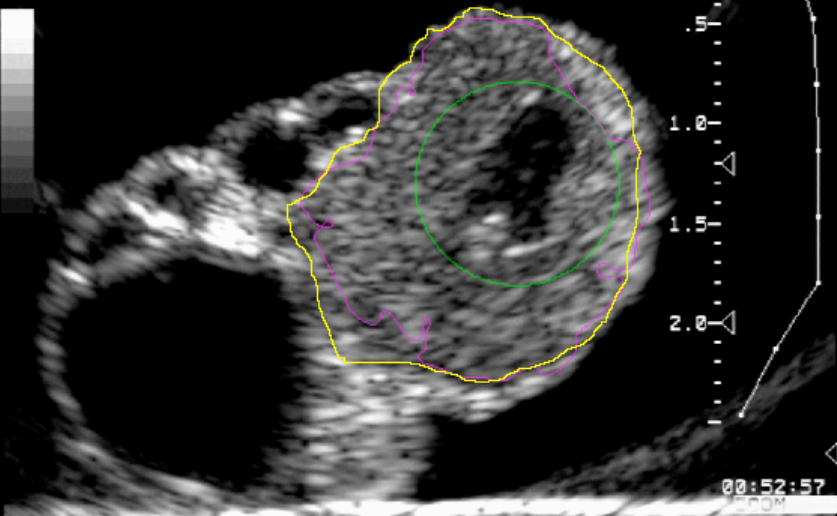

00:52:57  
COM

Supplement: MOESM8 [file 9567888]
